# Supplementary material
Source: PubMed Central journal article supplement (PMC2871504)
Supplement: supp_M109.061424_jbc.M109.061424-1.pdf [file supp_M109.061424_jbc.M109.061424-1.pdf]

Fig.S1

A

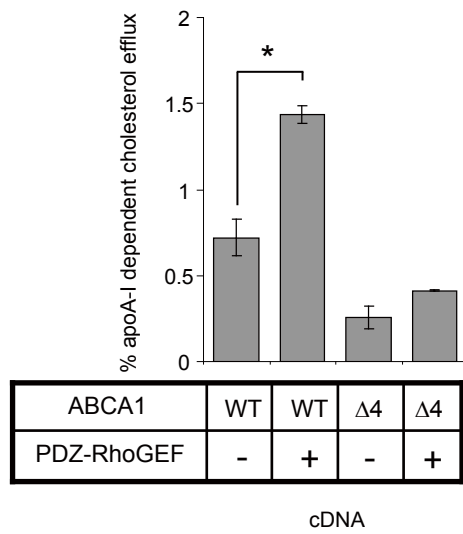

B

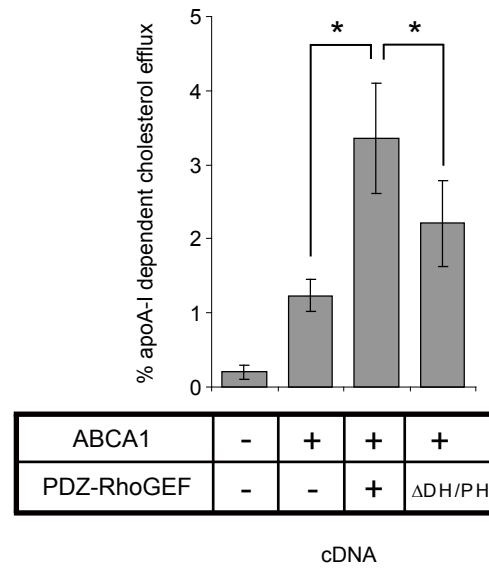

**Supplemental Figure.S1** Cholesterol efflux activity. (A) Co-transfection of a PDZ-RhoGEF with wild-type ABCA1 but not with the ABCA1-Δ4 mutant which disrupts the ABCA1 PDZ binding motif stimulates efflux to apoA-I. (B) The ability of PDZ-RhoGEF to enhance cholesterol efflux was attenuated in cells expressing PDZ-RhoGEF ΔDH/PH mutant. Error bars denote standard deviations of triplicate samples. Results are representatives of two or more experiments; \*,  $p < 0.05$
